# Supplementary figures and images for: Single pulse heating of a nanoparticle array for biological applications
Source: Royal Society of Chemistry journal article supplement (doi:10.1039/d1na00766a), 2022-01-01

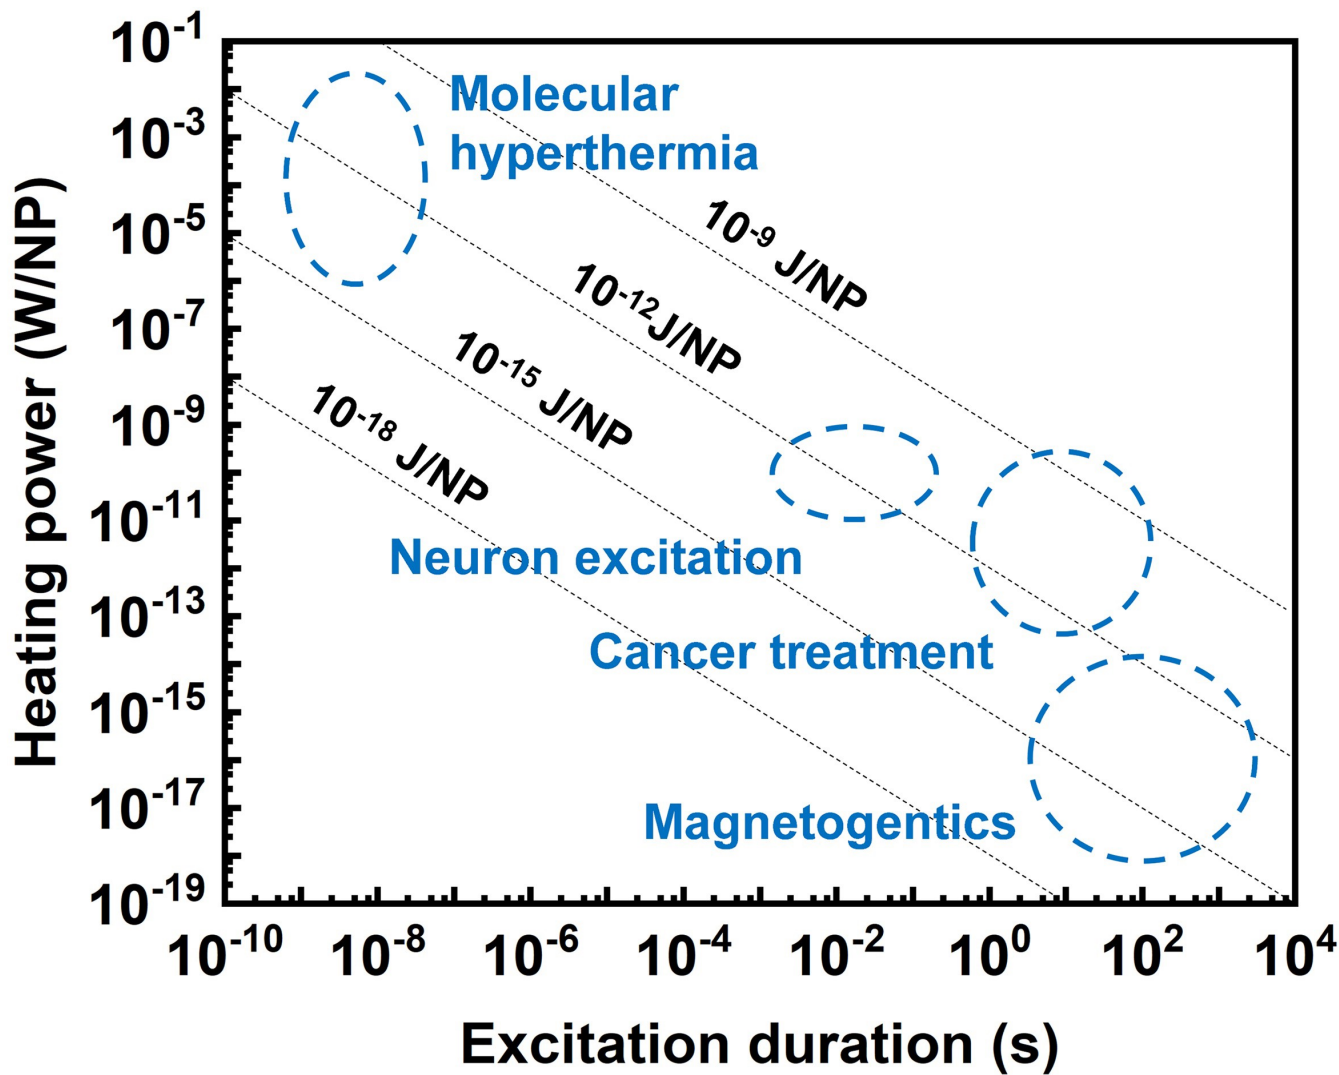

Supplement: d1na00766a1.pdf [file d1na00766a1.pdf]

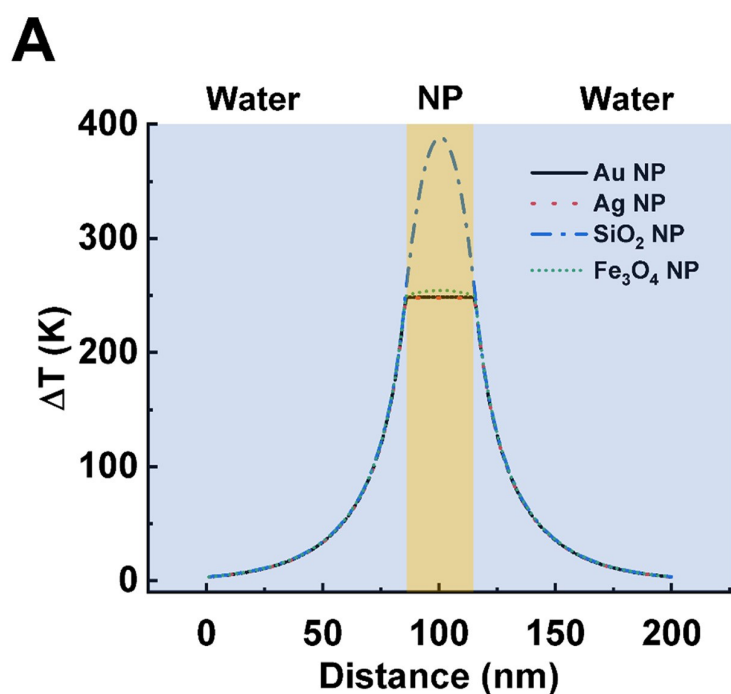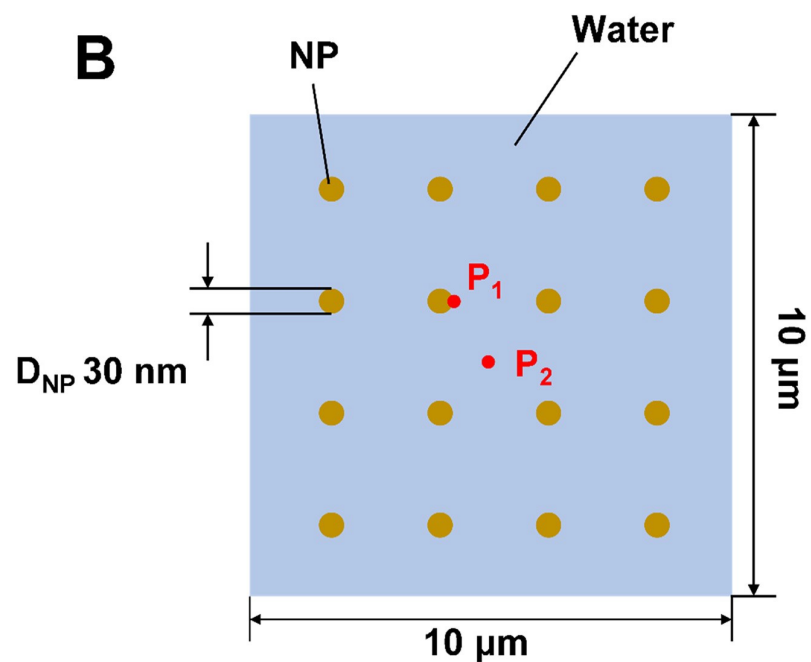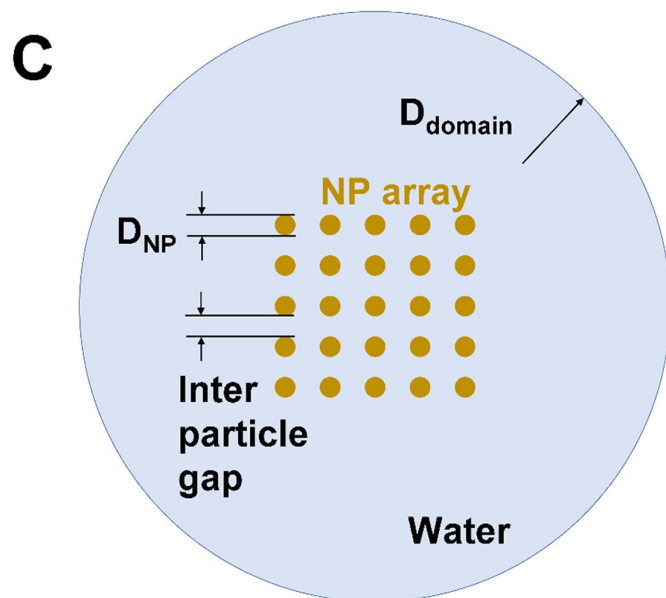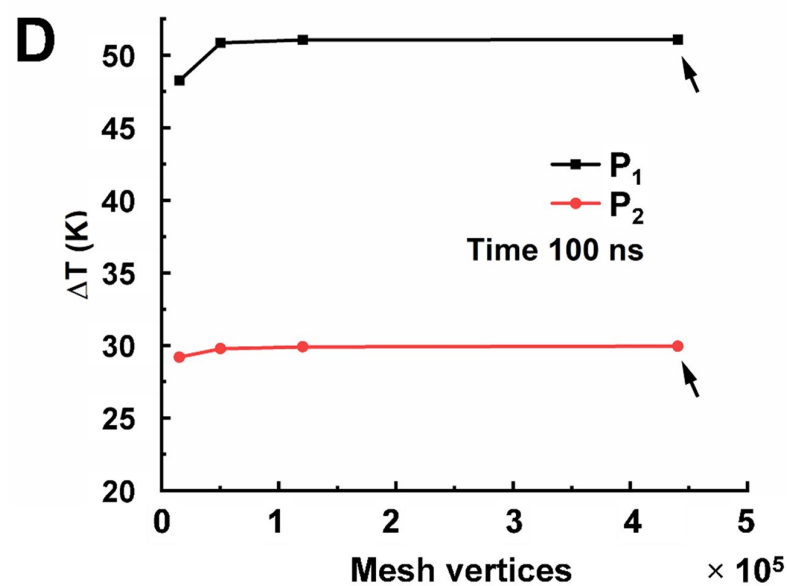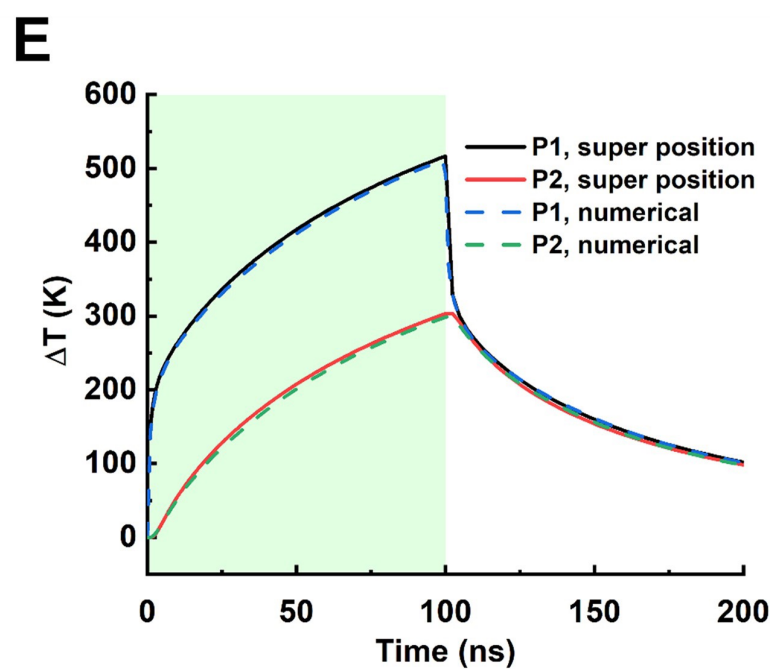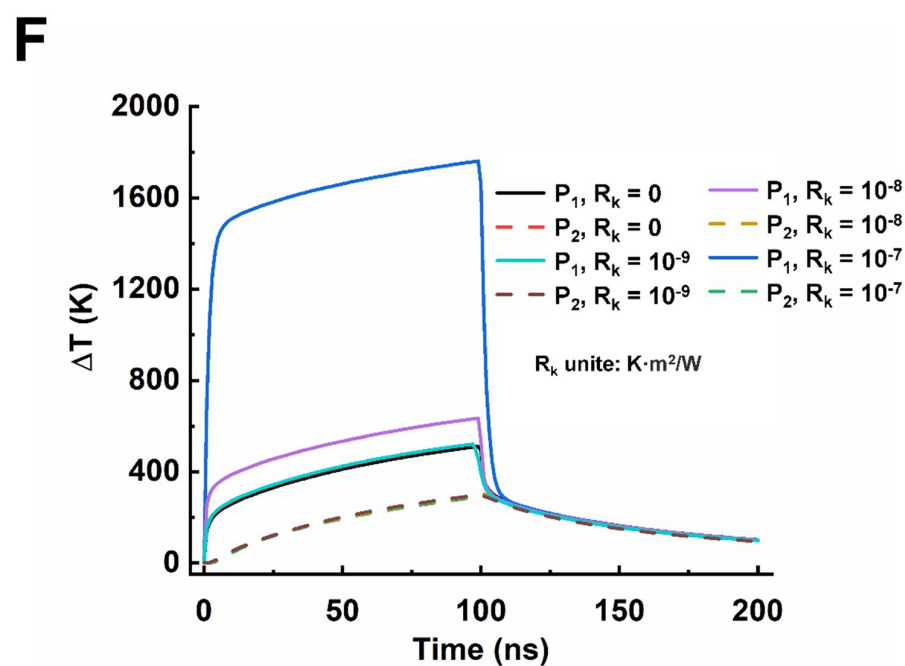

Supplement: d1na00766a2.pdf [file d1na00766a2.pdf]

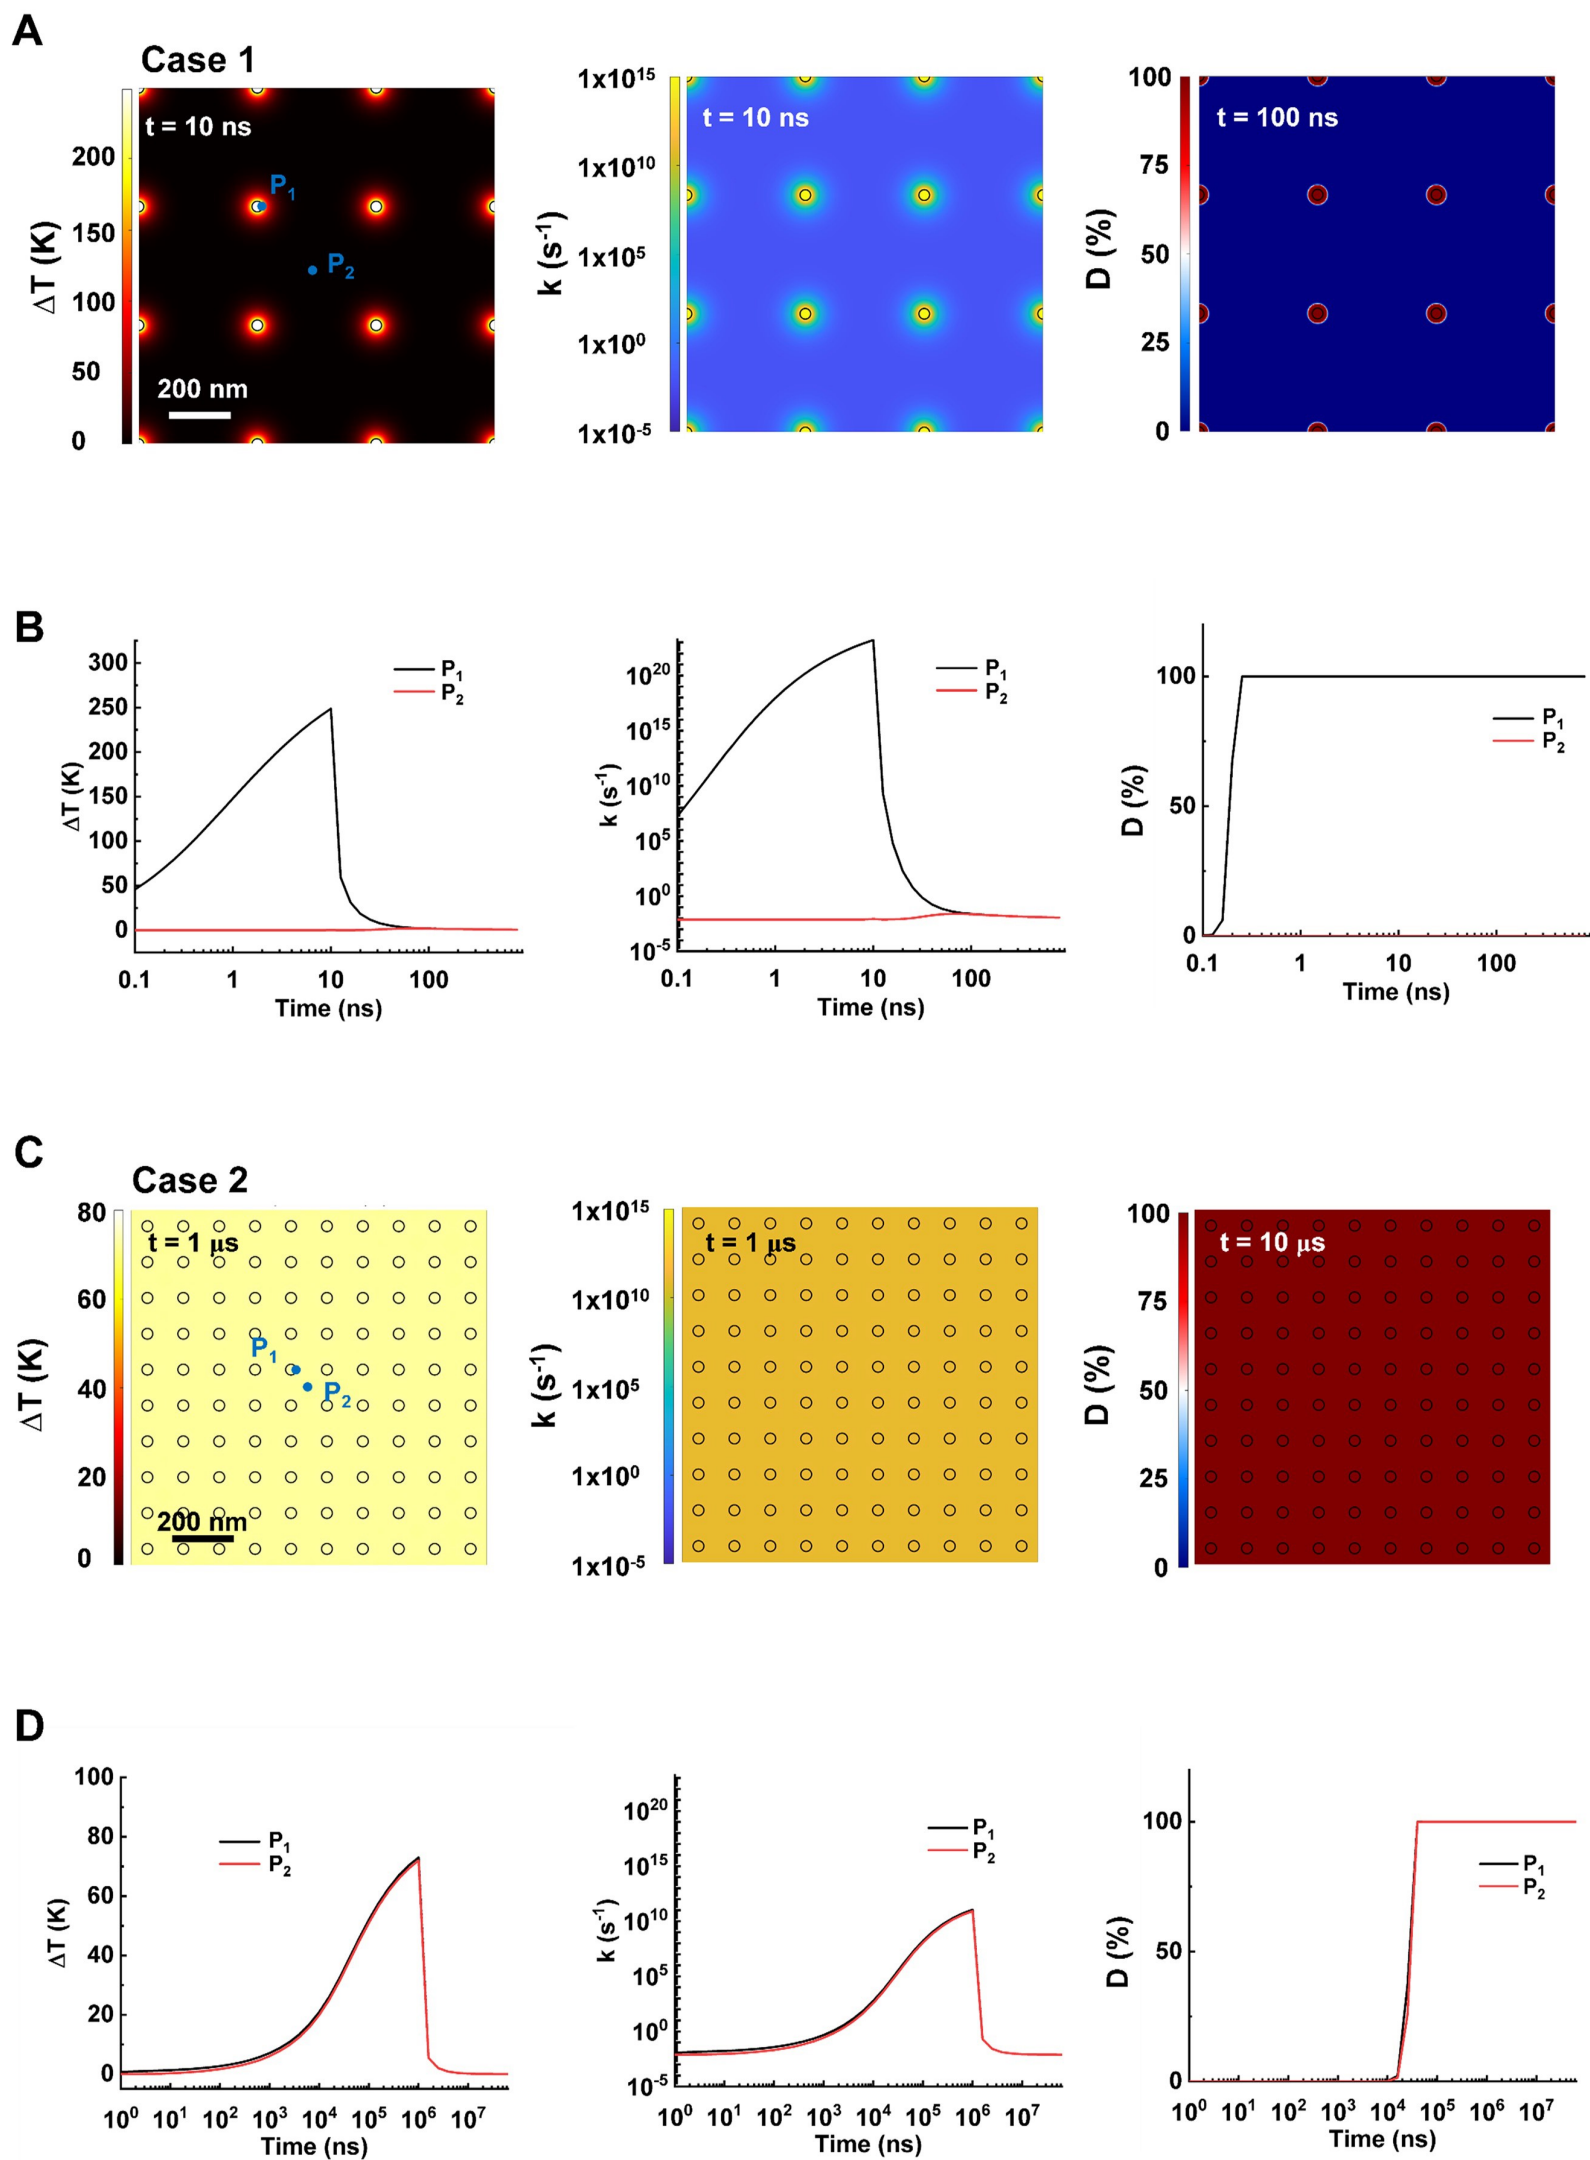

Supplement: d1na00766a3.pdf [file d1na00766a3.pdf]

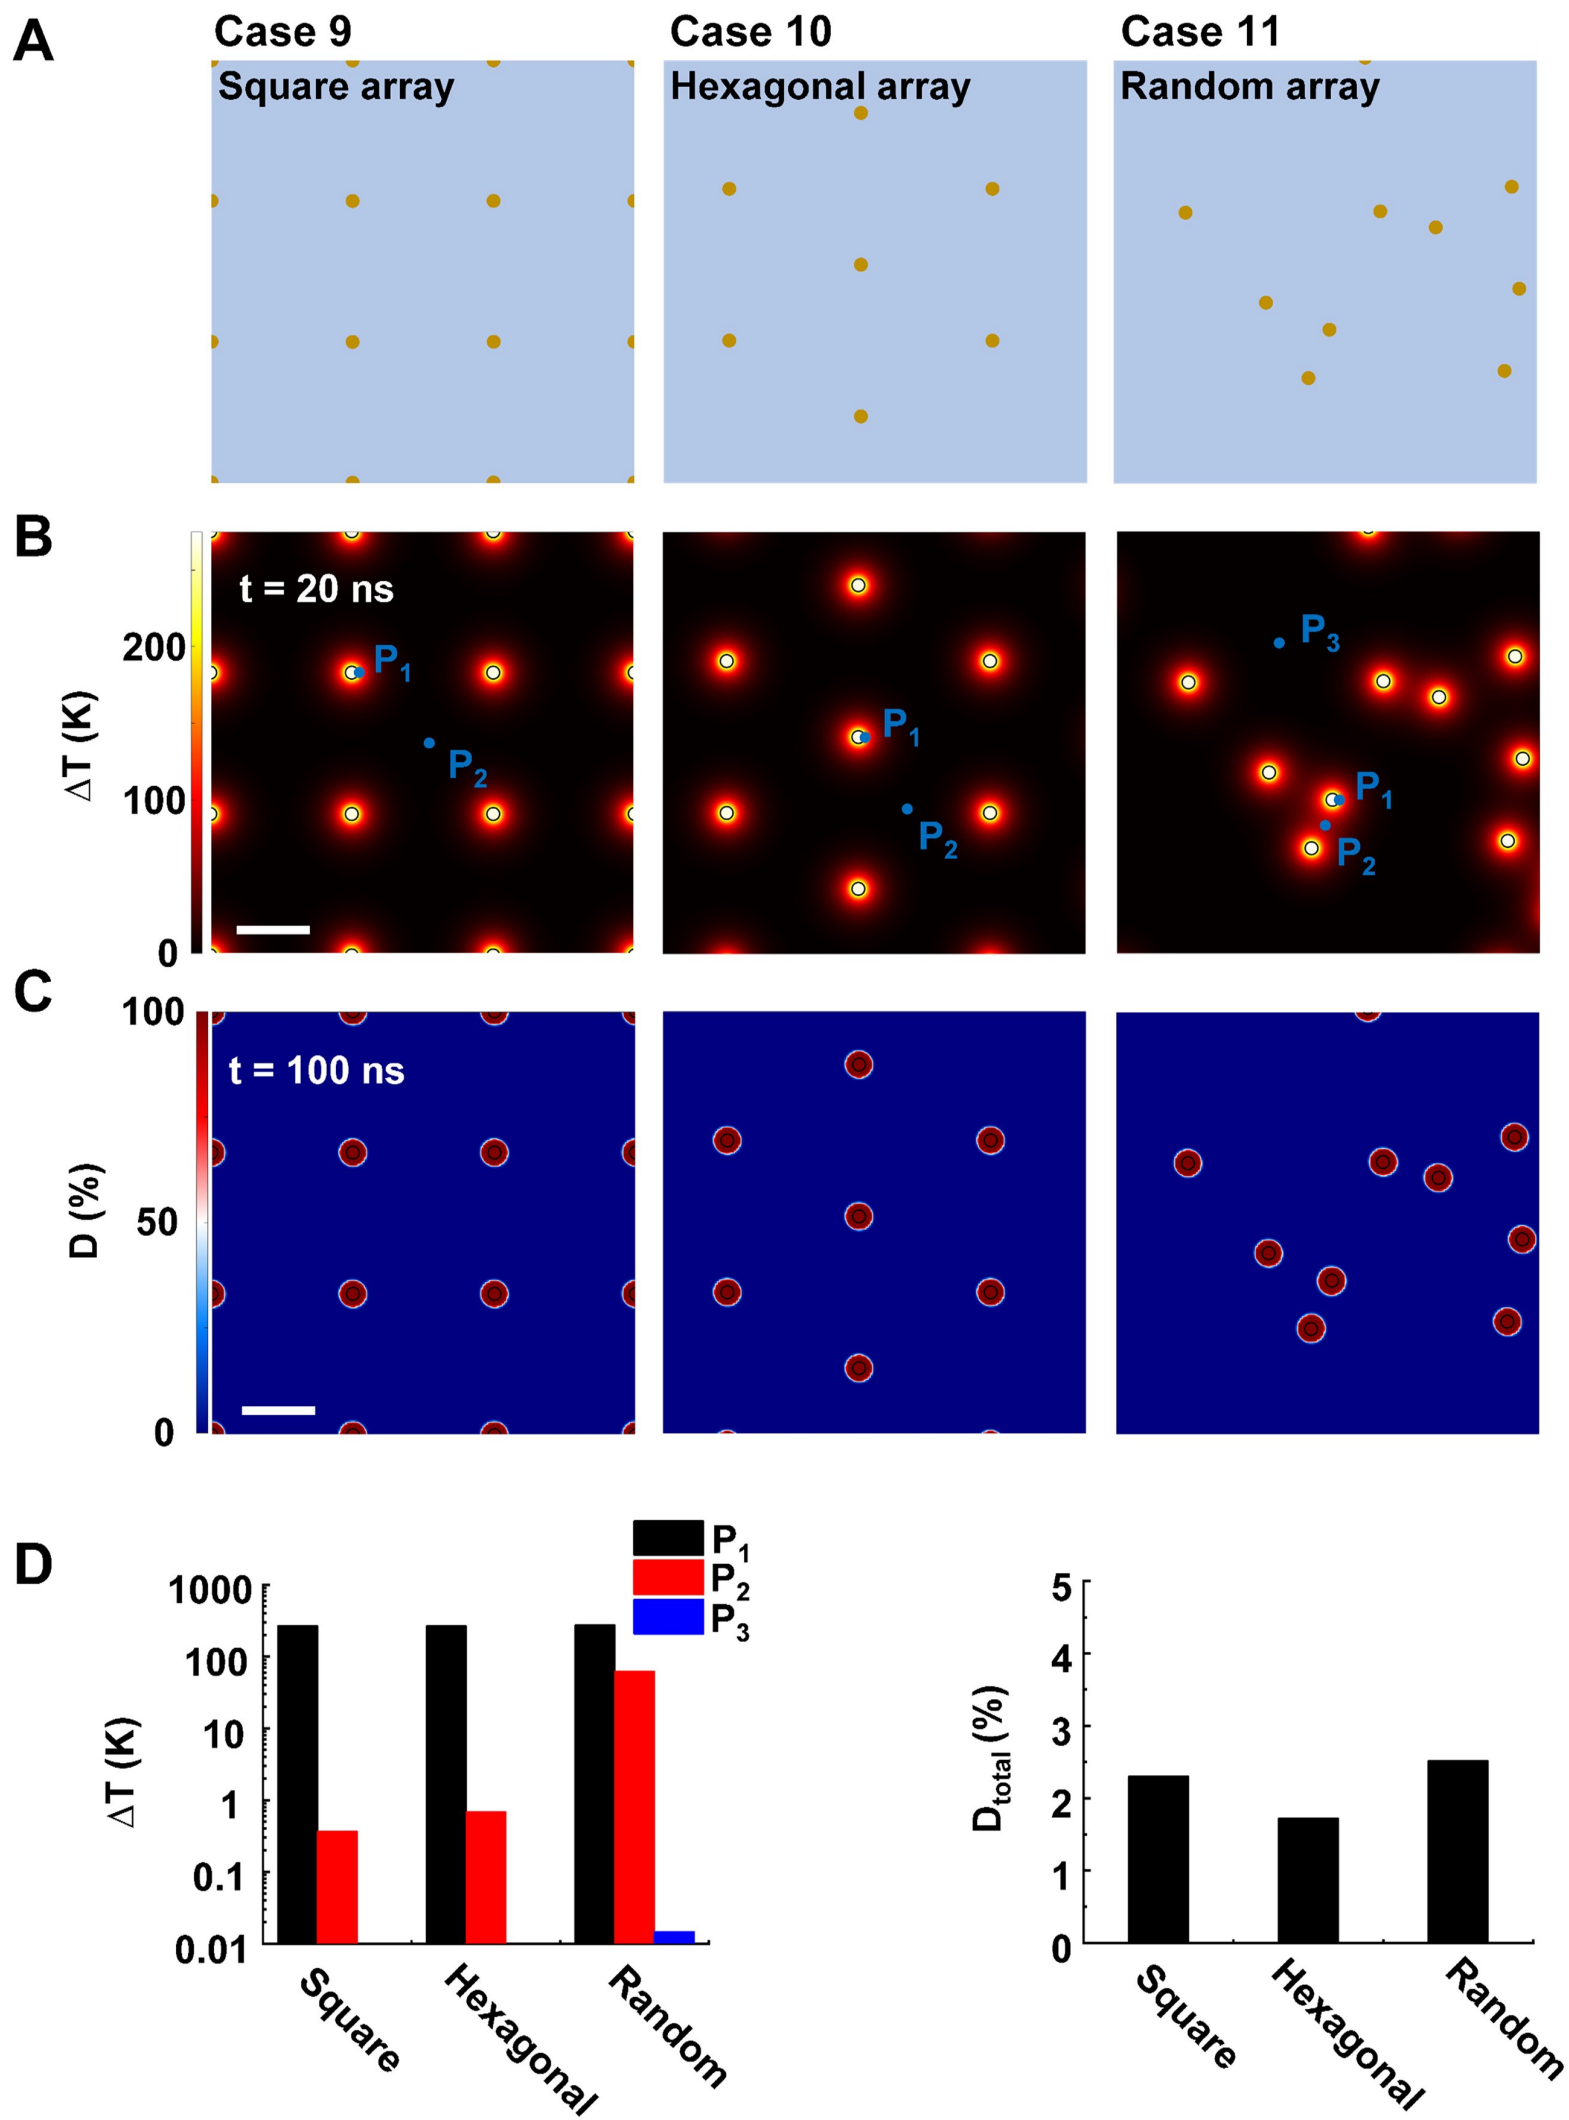

Supplement: d1na00766a4.pdf [file d1na00766a4.pdf]

**A**

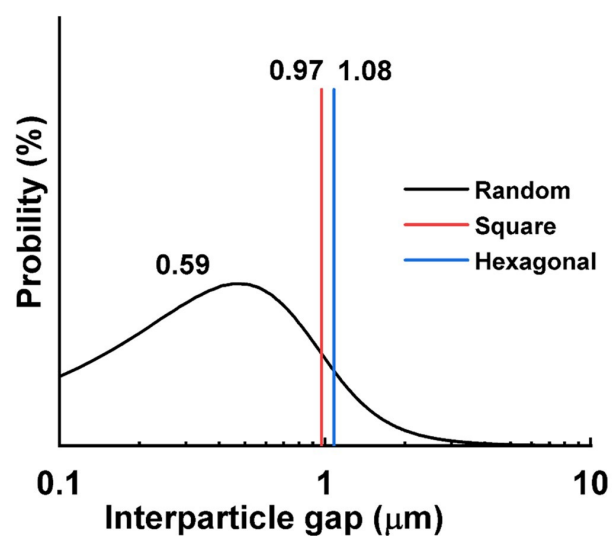

**B**

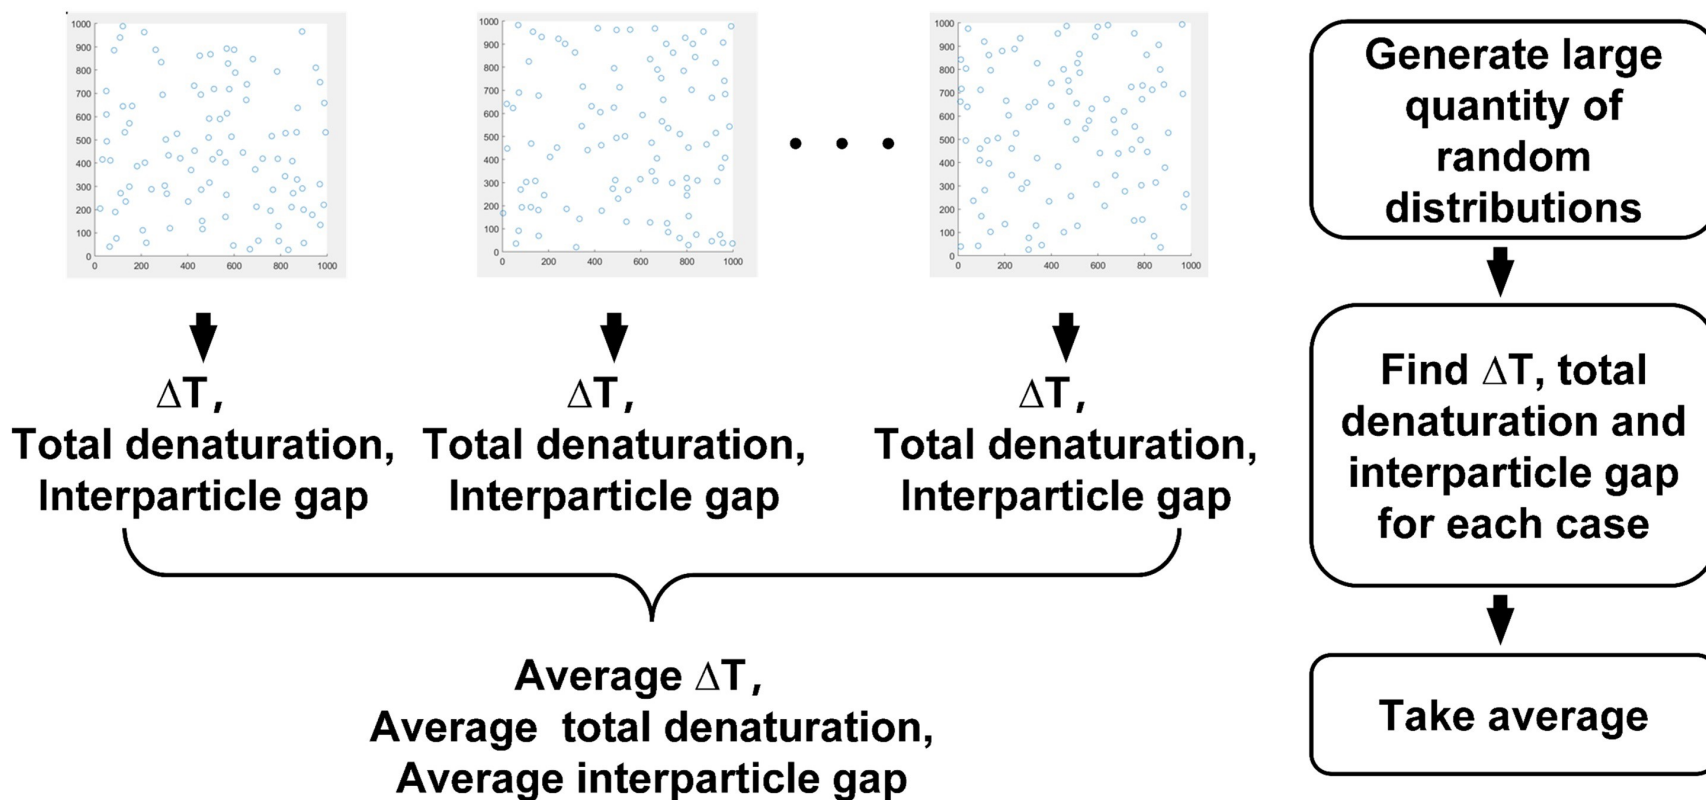

Supplement: d1na00766a5.pdf [file d1na00766a5.pdf]

**A**

**Case 12**

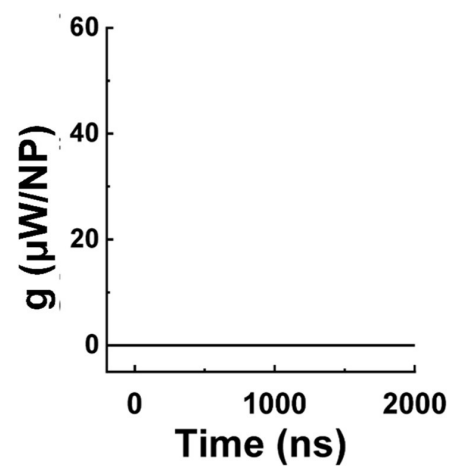

**Case 13**

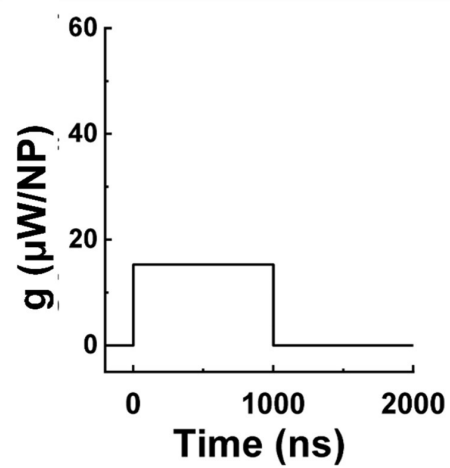

**Case 14**

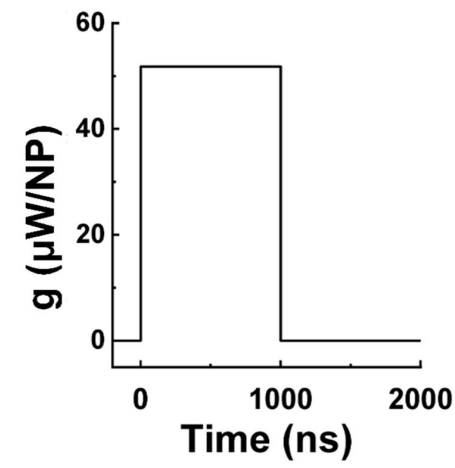

**B**

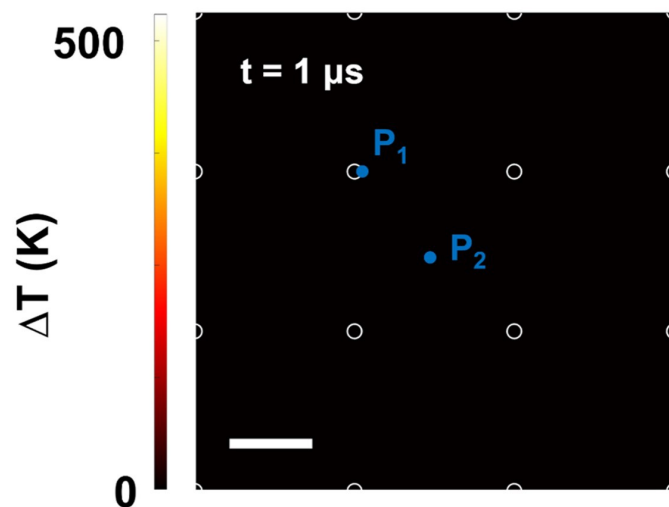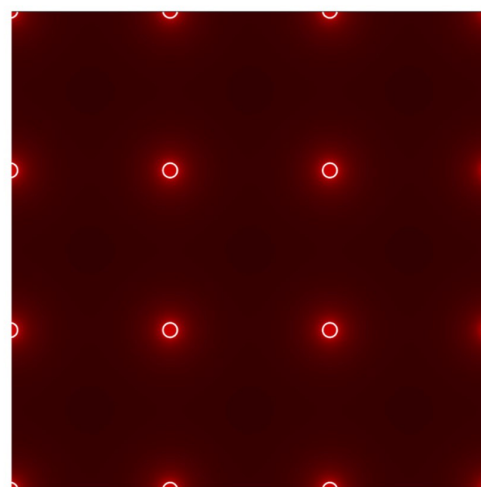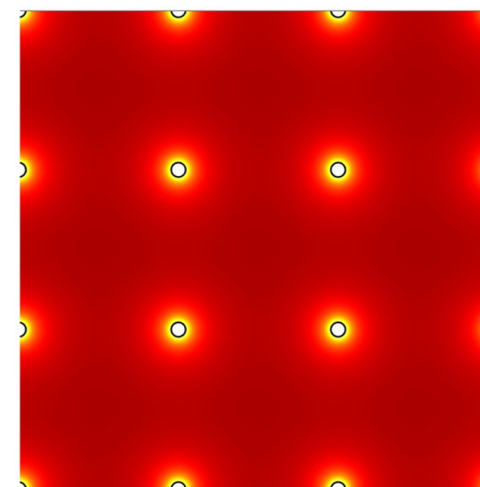

**C**

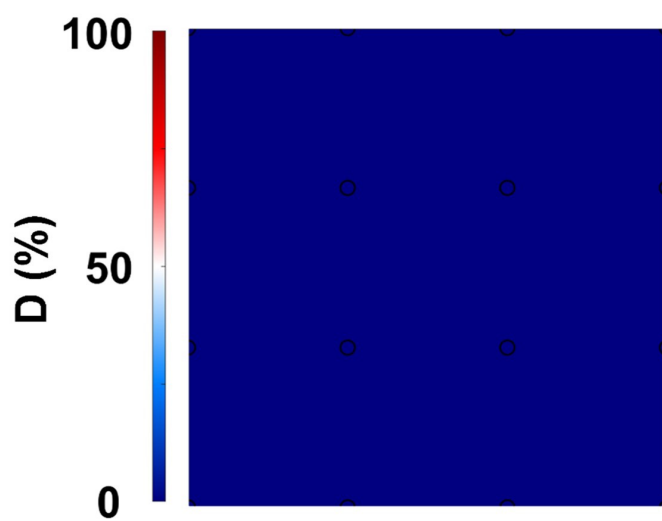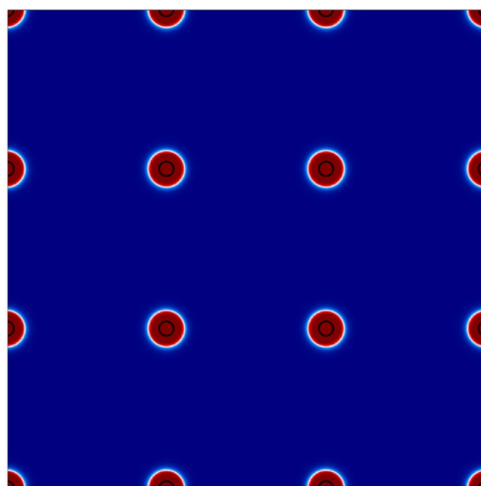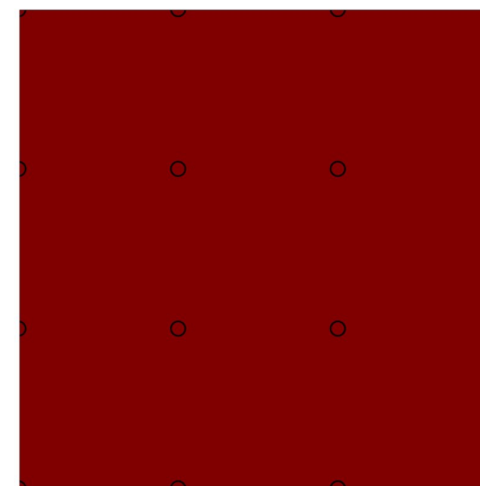

Supplement: d1na00766a6.pdf [file d1na00766a6.pdf]

**A**

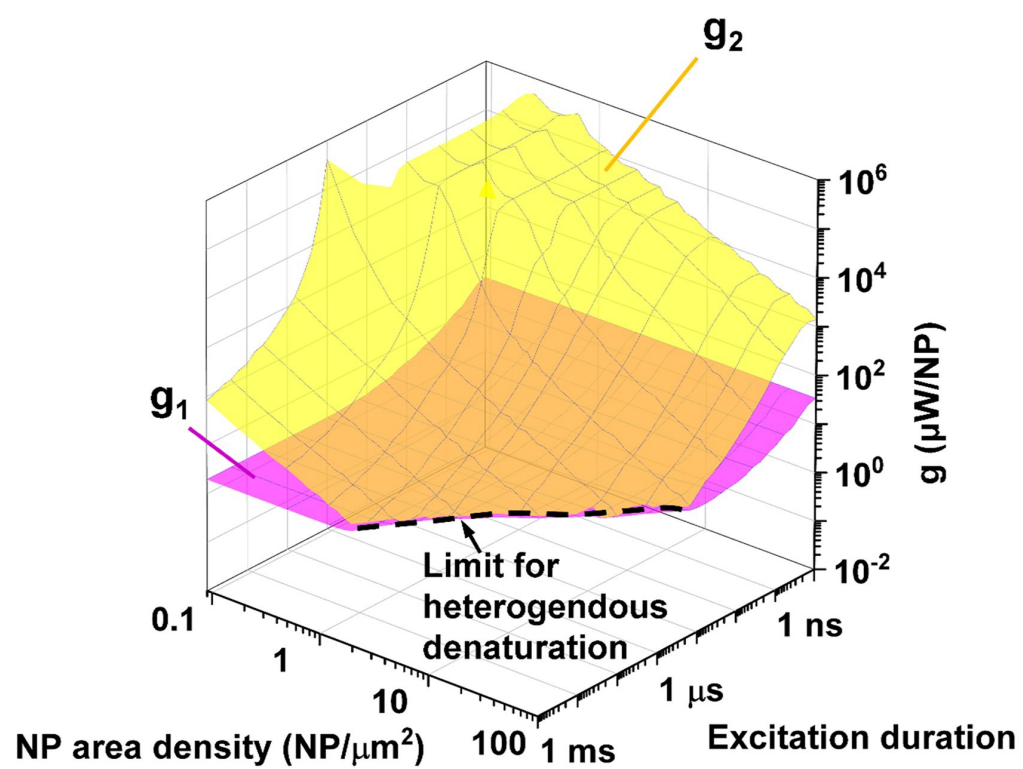

**B**

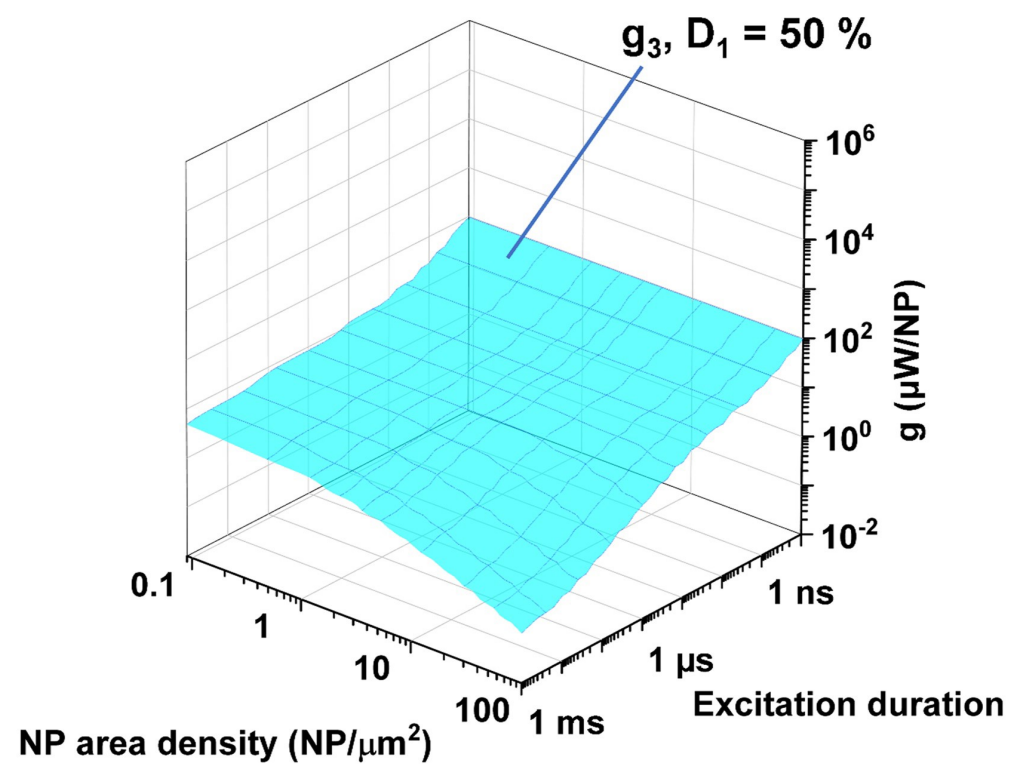

**C**

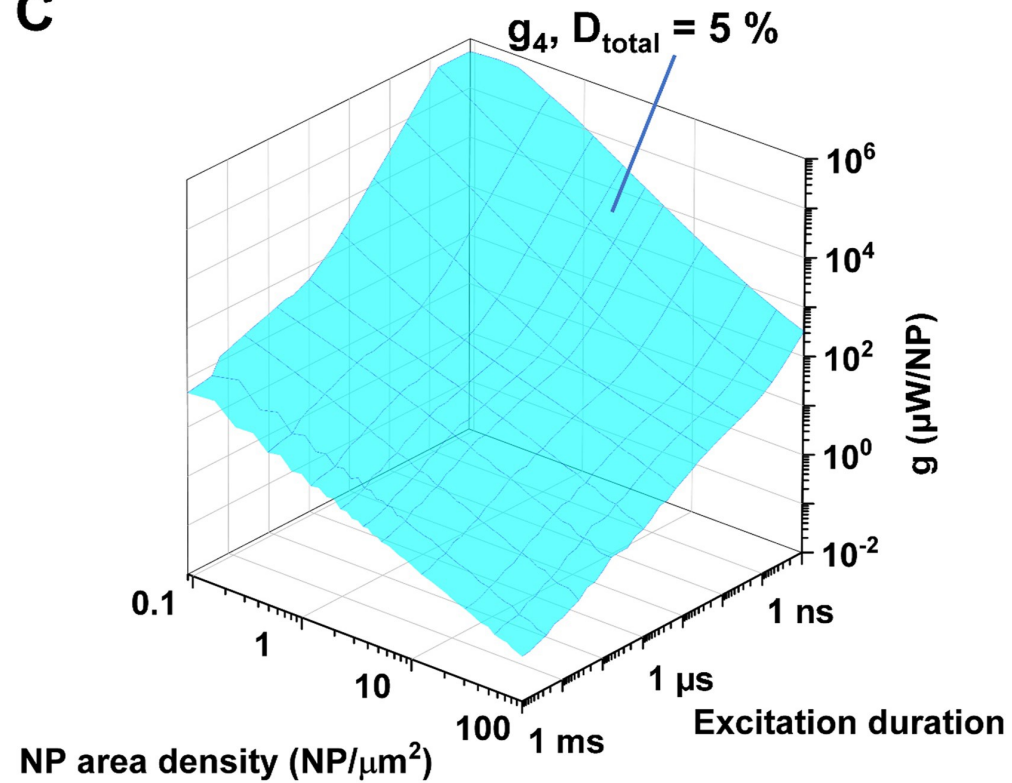

Supplement: d1na00766a7.pdf [file d1na00766a7.pdf]
